# Supplementary material
Source: Springer Nature journal article supplement (https://www.springermedizin.de/resource/supplementary/13049_2013_642_MOESM1_ESM.pdf/9666912)
Supplement: MOESM1 [file 9666912]

Figure.

| RIFLE category and component             | HES<br>n/N (%)   | Saline<br>n/N (%) | Relative risk<br>95% confidence<br>interval | p     | Result        |
|------------------------------------------|------------------|-------------------|---------------------------------------------|-------|---------------|
| RIFLE-R (risk)                           | 1788/3309 (54.0) | 1912/3335 (57.3)  | 0.94 (0.90-0.98)                            | 0.007 | HES better    |
| Creatinine increase (x1,5) from baseline | 462/3149 (14.7)  | 415/3171 (13.1)   | 1.12 (0.99-1.27)                            | 0.07  | n.s.          |
| Urine output <0.5 ml/kg/h x 6h           | 1701/3230 (52.7) | 1846/3266 (56.5)  | 0.93 (0.89-0.97)                            | 0.002 | HES better    |
| RIFLE-I (injury)                         | 1130/3265 (34.6) | 1253/3300 (38.0)  | 0.91 (0.85-0.97)                            | 0.005 | HES better    |
| Creatinine increase (x2) from baseline   | 245/3149 (7.8)   | 191/3171 (6.0)    | 1.29 (1.08-1.55)                            | 0.006 | Saline better |
| Urine output <0.5 ml/kg/h x 12h          | 1077/2977 (36.2) | 1200/3024 (39.7)  | 0.91 (0.85-0.97)                            | 0.005 | HES better    |
